# Supplementary material
Source: Springer Nature journal article supplement (https://www.springermedizin.de/resource/supplementary/12979_2012_143_MOESM1_ESM.pdf/9603064)

**Male****T cells****Female**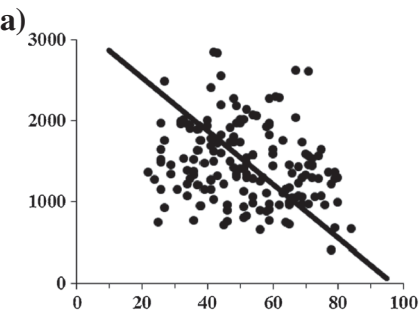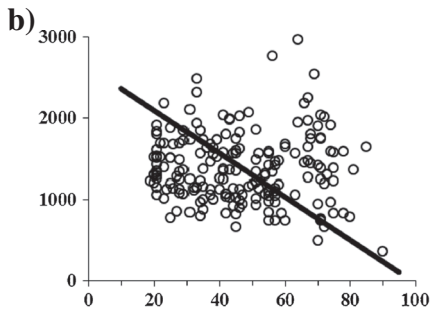**CD8<sup>+</sup>T cells**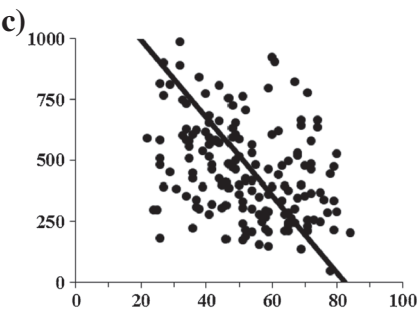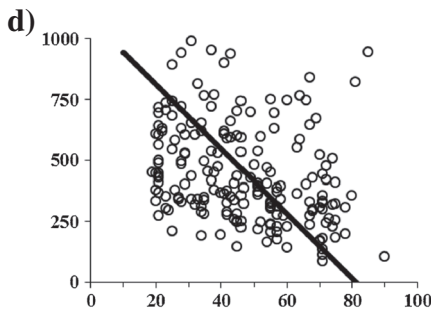**CD8<sup>+</sup> CD28<sup>+</sup> T cells**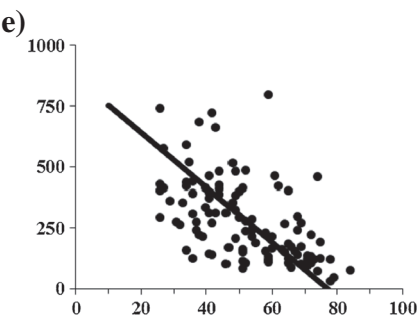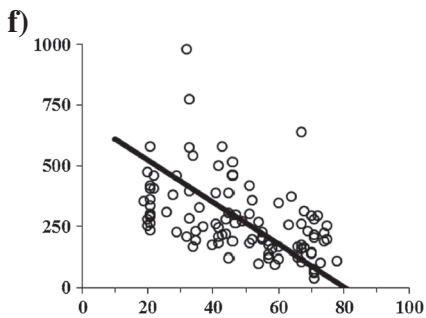**T cell proliferation index (TCPI)**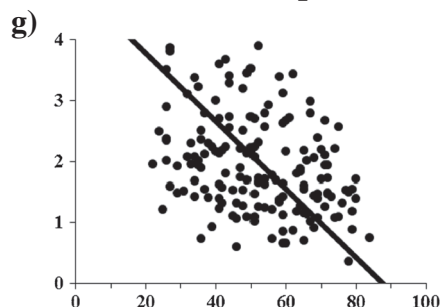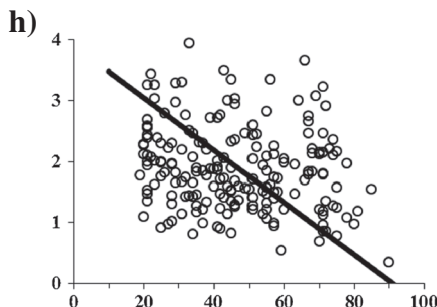

Supplement: MOESM1 [file 9603064]
